# Supplementary material for: Prevalence of Colonization with Multidrug-Resistant Bacteria: Results of a 5-Year Active Surveillance in Patients Attending a Teaching Hospital
Source: MDPI journal article supplement (doi:10.3390/antibiotics12101525), 2023-10-10
Supplement: s1 [file s1]

January 1, 2017 -December 31, 2021

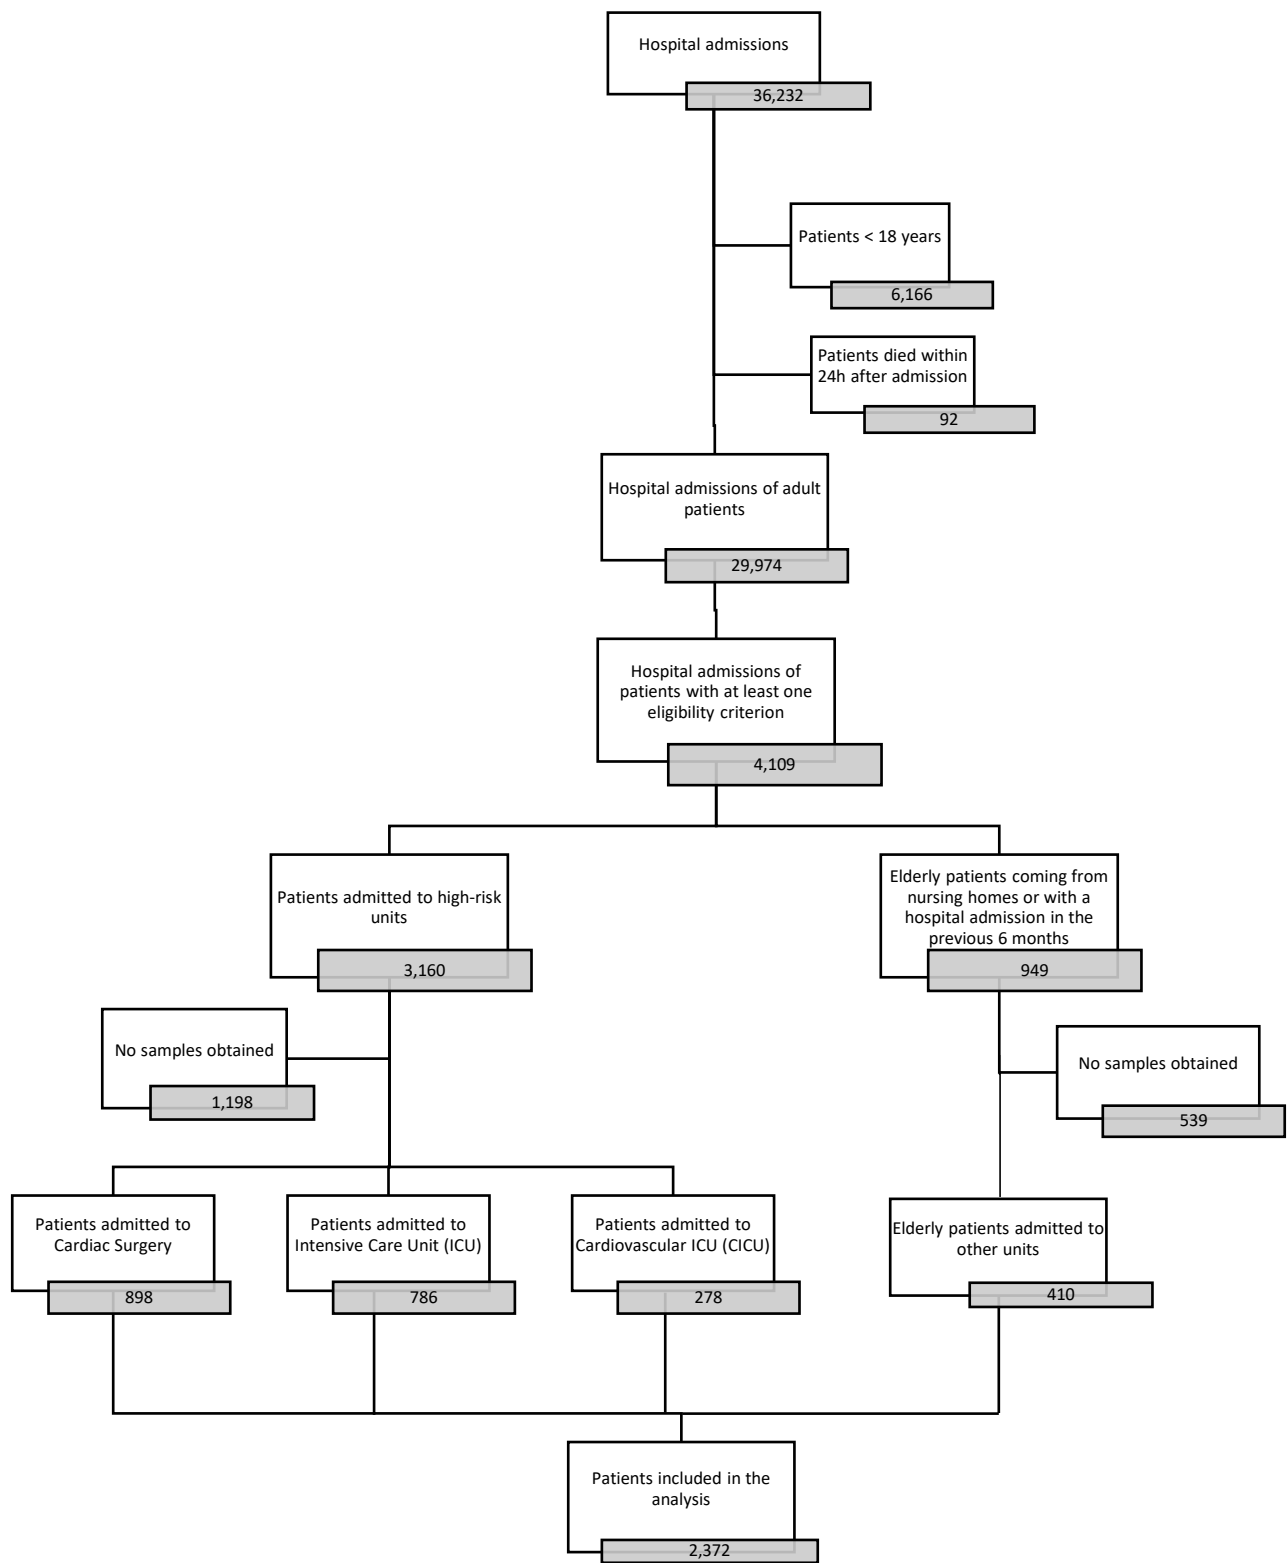

Figure S1. Flow-chart of sampling procedures of the study

**Table S1. Results of the multilevel logistic regression analysis for estimates of associations of AMR pattern of isolates with explanatory variables**

**Model 1: Outcome:** AMR pattern of isolates from nasal swabs

Log-likelihood = -94924.567; Prob > chi2 = 0.2460; Obs = 493

| Variables                 | OR   | 95% CI    | p     |
|---------------------------|------|-----------|-------|
| Hospital wards            |      |           |       |
| Cardiac Surgery*          | 1.00 |           |       |
| ICU and CICU              | 1.08 | 0.95-1.22 | 0.243 |
| Other wards               | 1.18 | 0.99-1.41 | 0.068 |
| Sex                       |      |           |       |
| Female*                   | 1.00 |           |       |
| Male                      | 0.94 | 0.83-1.06 | 0.289 |
| Age in years (continuous) | 0.99 | 0.99-1.00 | 0.932 |

**Model 2: Outcome:** AMR pattern of isolates from pharyngeal swabs

Log-likelihood = -113078.35; Prob > chi2 < 0.001 ; Obs = 422

| Variables                 | OR   | 95% CI    | p      |
|---------------------------|------|-----------|--------|
| Hospital wards            |      |           |        |
| Cardiac Surgery*          |      |           |        |
| ICU and CICU              | 1.74 | 1.31-2.33 | <0.001 |
| Other wards               | 0.90 | 0.64-1.25 | 0.519  |
| Sex                       |      |           |        |
| Female*                   | 1.00 |           |        |
| Male                      | 1.04 | 0.78-1.39 | 0.795  |
| Age in years (continuous) | 0.99 | 0.98-1.00 | 0.146  |

**Model 3: Outcome:** AMR pattern of isolates from rectal swabs

Log-likelihood = -30431.049; Prob > chi2 = 0.4123; Obs = 132

| Variables                 | OR   | 95% CI    | p     |
|---------------------------|------|-----------|-------|
| Hospital wards            |      |           |       |
| Cardiac Surgery*          | 1.00 |           |       |
| ICU and CICU              | 1.03 | 0.80-1.31 | 0.842 |
| Other wards               | 0.56 | 0.26-1.18 | 0.125 |
| Sex                       |      |           |       |
| Female*                   | 1.00 |           |       |
| Male                      | 0.70 | 0.41-1.22 | 0.211 |
| Age in years (continuous) | 0.99 | 0.98-1.01 | 0.721 |

Abbreviations: ICU, Intensive Care Unit; CICU, Cardiovascular Intensive Care Unit.

\*Reference category.
